# Supplementary material
Source: publisher site journal article supplement (https://www.dovepress.com/article/560360)
Supplement: Supplementary file 1 [file 560360%20Supplemental%20Table.docx]

Supplemental Table 1. *Empirical Human Cannabis Studies Relevant for Aging.*

| **In-text Citation** | **Location (If available, medical/recreational legalization)** | **Sample Size** | **Age Range** | **Cannabis Measure(s)** | **Conclusions** |
| --- | --- | --- | --- | --- | --- |
| **Overview** | | | | | |
| Han et al., 20256 | U.S.a national sample (Variable) | 15,689 | 65+ | Past month use as Y/Nb | Past month use increased from 4.8% to 7% from 2021 to 2023, particularly among high socioeconomic status and individuals with chronic medical conditions. |
| Hyatt et al., 20258 | U.S. national sample (Variable) | 55,406 | 18-90 | Past month use as Y/N | Cannabis use increased in a given state in the five years following legalization for recreational use between 2013 and 2022. |
| Constantin & Jayawardhana, 20269 | U.S. national sample (Variable) | 42,163-46,906 | 18-65+ | Past month use as Y/N | Cannabis-only use increased from 3.9% to 10.6% whereas tobacco-only use decreased from 15% to 8.8% between 2015 and 2023. |
| **Patterns of use** | | | | | |
| Arora et al., 201913 | Colorado, U.S. (Locally Legal) | 274 | 60+ | Frequency of use at age 18, 18-30, 31-49, 50-64, 65+ | Three distinct patterns were identified (long-term, new, and stop-out), which varied on route of administration and frequency of current use. |
| Manning & Bouchard, 202114 | Illinois, U.S. (Variable as of 2020) | 10 | 64-83 | Qualitative interviews | Participants reported receiving benefit in chronic condition symptom management, but also described lack of education and support in maximizing benefit. |
| Fernandez et al., 202416 | U.S. national sample (Variable) | 2,018 | 50-80 | Past year frequency of use | Approximately 12% of participants reported past year use, and younger age, White race, single marital status, and unemployment were associated with greater likelihood of use. |
| De Genna et al., 202417 | Pennsylvania, U.S. (Variable as of data collection in 2016) | 910 | 65-85+ | Past year use as Y/N, and ever used as Y/N | Approximately 20% of the sample reported any lifetime cannabis use and individuals reporting cannabis use were more likely to be men, younger than 75, and have higher education. |
| Cuttler et al., 201618 | Washington, U.S. (Locally Legal) | 2,374 | *M* = 33.56 | Y/N for recreational, medicinal, or religious use and administration method, frequency of current use | Men reported using cannabis more frequently, in higher quantities, and via inhalation methods in comparison with women. |
| Subbaraman & Kerr, 202119 | Washington, U.S. (Locally Legal) | 5,492 | 18-65+ | Frequency of past year cannabis use, most common administration method | Overall cannabis use increased across age groups, with sex and age differences found, such as oral administration being more common with increasing age. |
| Livne, 202420 | U.S. national sample (Variable) | 4,734 | 18-65+ | Past week cannabis use including frequency, time of day, administration method, and product potency | Middle-aged and older adults were more likely to use cannabis in the evening, via only one administration method, via smoking, and with less potent products compared with younger adults. |
| **Reasons for use** | | | | | |
| Arora et al., 202021 | Colorado, U.S. (Locally Legal) | 274 | 60+ | Constructed a measure assessing attitudes on medical and recreational cannabis. | Scales enable researchers to accurately measure attitudes toward cannabis among OAc. |
| Yang et al., 202122 | California, U.S. (Locally Legal) | 83 were retained from a sample of 568 | Largely 65+ (only 2 were identified as “<65”) | Cannabis use frequency (e.g., daily, weekly, monthly, yearly or less), CBDd or THCe or not sure characteristic, use type (e.g., medical, recreational, or both), where product was obtained (e.g., dispensary, grocery store, etc.), administration form (e.g., smoking, edibles, etc.), who knows about use (e.g., healthcare provider, family member, etc.), time of first use | 60% of OA in the sample initiated cannabis use after age 60 and used it primarily for medical purposes (78%). Pain/arthritis was the most common targeted condition/symptom (73%) followed by sleep disturbance (29%), anxiety (24%) and depression (17%). Just over 75% reported cannabis was “somewhat” or “extremely” helpful with managing one of these conditions with few side effects. Just over half obtained cannabis from a dispensary. Lotions (35%), tinctures (35%), and smoking (30%) were the most common administration forms. Family members were most likely to know about their cannabis use (94%), followed by friends (approximately half), and healthcare providers (41%). |
| Bolt et al., 202523 | Canada (Fully Legal) | 1,615 | 50+ | Cannabis use history (non-use, current use, prior use, considering use) and opinions regarding the effectiveness of cannabis for OA, within family and friend group stigma, and about perceived cannabis use safety and risk | 44% of respondents reported current cannabis use followed by non-use (33.2%), prior use (16.5%), and considering use (6.1%). Nearly half (49.2%) perceived the risks of using cannabis to be low or very low, and the greatest concerns about cannabis use pertained to cognition/mental health (40.8%), physical health (19.1%), and available product information (18.0%). 60.4% somewhat or strongly agreed there is not enough information on cannabis safety and effectiveness (63.8%). 34.7% perceived negative stigma amongst family and friends. |
| Dahlke et al., 202424 | Canada (Fully Legal) | 34 | 60-80 | Perceptions of cannabis, motivations to want to/use cannabis as an OA, stigma associated with cannabis use, trusted sources of information, experience accessing cannabis | Perceived stigma was evident in this sample for both past and present perceptions of cannabis, which influenced cannabis access, consumption, and comfort with discussing cannabis use with their healthcare providers. |
| Bolt et al., 202425 | Canada (Fully Legal) | 1,615 | 50+ | Perceptions of cannabis effectiveness, safety and accessibility for medical purposes, identify factors influencing cannabis perceptions | Majority of participants viewed cannabis as a reasonable alternative (65.8%) and an effective (70.5%) treatment option for symptom management, and 34.5% felt cannabis is safe to use with most medicines. 16.4% felt OA compared to younger adults were at higher risk of side effects. Perceptions were influenced by gender, cannabis use history, and reasons for cannabis use. |
| Kleidon et al., 202326 | Pennsylvania, U.S. (Variable) | 50 | 65+ | Knowledge, attitudes, beliefs, and perceptions of cannabis | 67% of respondents considered cannabis a highly important treatment for OA, 42% considered themselves highly knowledgeable about cannabis. |
| Abu Baker et al., 202427 | California, U.S. (Locally Legal) | 19 | 65+ | Cannabis use reasons, perceived helpfulness, impact on medication use, and comfort level disclosing cannabis use | All participants used cannabis to treat pain and 75% for insomnia with 25-33% reductions in use of prescription medications to treat these symptoms, while 89% reported their healthcare providers were aware of their cannabis use. Interviews revealed participants felt motivated to disclose their cannabis use to their healthcare providers for medical advice and benefits of use, felt comfortable disclosing cannabis use because legalization had eased stigma, and perceived neutral attitudes from their providers about their cannabis use. |
| Baumbusch & Sloan Yip, 202228 | British Columbia, Canada (Fully Legal) | 12 | 71-85 | Beliefs about cannabis use | Legalization (the most important factor), acceptance within social networks, and cannabis in the media were factors that influenced a shift toward destigmatized beliefs about cannabis use, but non-medicinal or social reasons of cannabis use remained stigmatized. |
| Lum et al., 201929 | Colorado, U.S. (Locally Legal) | 274 | 60+ | Lifetime and past-year cannabis use, health-related questions, sources of cannabis, methods of use | 45% of participants reported past-year cannabis use, where 54% of these participants used cannabis both medically and recreationally, and reported improvements for overall health, quality of life, day-to-day functioning, and in pain. Reasons for use included arthritis, chronic back pain, anxiety, and depression. Odds of past year use decreased with each additional year of age, among women, those with higher self-reported health statuses, and were higher for those who endorsed past-year opioid use. |
| Fahey et al., 202530 | South Carolina, U.S. (Locally Illegal) | 524 | 65+ | Lifetime use, reasons for use | Almost half of OA cancer survivors had used cannabis, but only 8% had discussed cannabis with a medical provider. |
| Lau et al., 201531 | California, U.S. (Locally Legal) | 97 | 48-68 | Life history interview, health survey, perspectives on cannabis harm reduction factors | OA opted to use cannabis during leisure-time so that it did not interfere with other parts of their lives, in regulated settings that emphasized “self-control” and “respect for non-users,” and managed disclosure to protect themselves from stigmatization. |
| Thayer et al., 202532 | Colorado, U.S. (Locally Legal) | 78 | 60+ | CUDf screen, current cannabis use frequency | OA who screened positive for CUD endorsed higher routine, social, coping, and conformity motives than those who endorsed non-harmful cannabis use. Absent of higher alcohol or cannabis use, those who screened positive for depression or anxiety endorsed higher coping and routine motives. |
| **Risks with use** | | | | | |
| Han et al., 201733 | U.S. national sample (Variable) | 47,140 | 50-65+ | Past year use as Y/N | Past year use was associated with younger age, male sex, non-Hispanic ethnicity, and co-use of alcohol, tobacco, and/or other recreational substances. |
| Rubenstein et al., 202536 | U.S. national sample (Variable) | 47,291 | 18-50+ | Past month use as Y/N | Past month co-use of alcohol and tobacco increased from 2002 to 2019 across all adult age groups except for 18-25, which saw a decrease from 2014-2019. |
| Phillips et al., 202537 | Hawai’i, U.S. (Variable) | 367 | 50-99 | Cannabis and alcohol co-use | Approximately 72% of participants reported co-use of alcohol and cannabis, with participants over 65 reporting more frequent alcohol use compared with those 50-64 years. |
| Tumati et al., 202138 | Canada (Fully Legal) | 9,766 | 65+ | Types of cannabis product used, ratio, potency, and frequency | More than half of participants reported improvement in pain, sleep, and pain management, and nearly 36% and 20% of participants reported reduced opioid and benzodiazepine use, respectively. |
| Choi et al., 202440 | U.S. national sample (Variable) | 47,100 | 18+ | Ever use as Y/N, age of onset, past year number of days used | Of participants who reported past year cannabis use, 30% met criteria for CUD, 10% received treatment, 38% had moderate/severe mental illness, and 52% reported a co-occurring SUDg. |
| Vacaflor et al., 202041 | Israel, United Kingdom, Germany (Variable) | 5,860 across 9 studies | 50+ | Past year use (at least once in past year) | More than half of participants endorsing past-year cannabis use reported past-year SUD and more than 80% reported lifetime SUD, though CUD was significantly less common than nicotine or alcohol use disorders. |
| Pravosud et al., 202542 | U.S. national sample (Variable) | 4,503 | 65-84 | Lifetime duration, administration method, and frequency of lifetime, past year, and past month | Among veterans endorsing cannabis use, male sex, younger age, anxiety symptoms, co-occurring substance use, primary use via inhalation, and recreational use were associated with increased likelihood of CUD. |
| Baumbusch & Sloan Yip, 202143 | British Columbia, Canada (Fully Legal) | 12 | 71-85 | Experience of starting to use cannabis in later life, how participants obtained cannabis, experiences of cannabis effects | Pain management, alternative to medications, and as a sleep aide were the main reasons reported for using cannabis. Despite using cannabis for medical purposes, most participants obtained from non-licensed stores, and received minimal guidance from family physicians. Unanticipated consequences of cannabis endorsed by participants included grogginess and dizziness. |
| Leos-Toro et al., 201846 | Canada (Fully Legal) | 276 | 18-30, 31-45, 46-71 | Past 30 days use, health reason for cannabis use, perceived medical/societal support and approval, and hidden cannabis use | These participants reported a lack of support from their doctors and 79.3% reported making an effort to conceal their medical cannabis use to avoid judgement. |
| Elbready et al., 202447 | Pennsylvania (Variable), Delaware (Locally Legal), New Jersey (Locally Legal), U.S. | 86 | Not applicable | Surveyed healthcare practitioner inquiries about alcohol, tobacco, and cannabis, frequency/experiences discussing medical cannabis with OA | Practitioners were more likely to inquire about alcohol and tobacco use than cannabis with older adults. Patients were more likely to initiate discussions about medical cannabis use with their providers. |
| **Common medical purposes** | | | | | |
| Azcarate et al., 202059 | U.S. national sample (Variable) | 9,003 | 50+ | Past year use, medical reasons for use | 7% of U.S. adults use cannabis for medical purposes, and many of those adults (33%) do not inform their doctors of their use. |
| Drake et al., 202562 | New York, U.S. (Locally Legal) | 60,074 | 65+ | Medical cannabis availability (geographic data) | Medical cannabis availability was linked to fewer reports of poor mental health among adults aged 65 and older, without negative effects on overall adult mental health. |
| You et al., 202561 | U.S. national sample (Variable) | 55,108 | 50+ | Past month use | Participants who used cannabis daily were 133% more likely to endorse frequent mental distress (i.e., 14 or more days out of 30 of poor mental health) and 76% more likely to report more than 14 out of 30 days of poor physical health. |
| **Cardiovascular and dementia risk** | | | | | |
| Cheung et al., 202466 | Canada (Fully Legal) | 22 | 18-30 | 3 cannabis conditions (smoking THC-predominant cannabis, vaping THC-predominant cannabis, vaping CBD-predominant cannabis) | Acute effects of cannabis include increases in arterial stiffness, arterial pressure, and heart rate. Changes in arterial pressure and heart rate did not occur in CBD condition. Increases in blood pressure seen when cannabis contained THC, but not CBD alone. |
| Ghasemiesfe et al., 202067 | Not Reported (Systematic Review) | 209 across 14 studies | 18-55 | Administration; variable route and potency | All studies showed association between cannabis and tachycardia following consumption. Mixed findings for blood pressure. |
| Alshaarawy & Vanderziel, 202169 | U.S. data collected 1988-1991 (Illegal) | 758 | 17-59 | Lifetime cannabis use (never used, used 1-99 times, used 100+ times) | Greater blood pressure variability was seen in active cannabis use compared to non-use. |
| Cheung et al., 202170 | Canada (Fully Legal) | 35 | 19-45 | Group comparison of non-use (<5 lifetime uses) and cannabis use (3+ years) | People who use cannabis showed greater aortic stiffness. |
| Mohammadi et al., 202571 | California, U.S. (Locally Legal) | 55 | 18-50 | Group comparison of chronic smoking (3+ uses per week for > 1 year), chronic edible use (3+ uses per week for >1 year), and never use | Differences in FMDh such that both use groups showed reductions. Strong negative correlation between number of weekly smoking sessions and FMD, as well as amount of edible THC used and FMD. |
| Gómez Ochoa, 202172 | Not Reported (Systematic Review) | 34 patients across 18 case studies | 15-64 | Included patients with reported history of cannabis use 24 hours before stroke onset | Notable absence of other risk factors in these cases, and strong temporal association between cannabis consumption and symptom onset in subsequent strokes. Cannabis may be a risk factor for stroke occurrence in young, otherwise healthy young adults. |
| Jeffers et al., 202473 | 27 U.S. states, Guam, and Puerto Rico (Variable) | 434,104 | 18-74 | Group comparison for past month use (daily, nondaily, none) | Cannabis use not associated with heart disease or MIi but was associated with stroke when measured across entire population. Cannabis was associated with heart disease, MI, and stroke in people at risk for premature cardiovascular disease (men < 55 and women < 65). |
| Kamel et al., 202574 | 53 healthcare organizations across U.S. (Variable) | 4,636,628; 93,267 with cannabis use | 18-50 | Cannabis use diagnoses | Higher absolute risk of myocardial infarction and ischemic stroke with cannabis use. |
| Richards et al., 201975 | Not Reported (Systematic Review) | 541,518 across 85 studies | 15-63 (Partial reporting) | Cannabis smoking | Cannabis use may increase risk for both acute coronary syndrome and chronic cardiovascular disease. |
| Storck et al., 202576 | Not Reported (Systematic Review) | 432,245,972 across 24 studies | Average Age Range 19-59, Weighted average age = 38.4 | Variety of measures (self-report, urine drug screening, diagnosis codes) | Cannabis use was associated with increased risk of stroke and MI, however, association with MI was weak and may not be clinically significant. |
| Abuhasira et al., 202177 | Israel (Variable) | 26 | 60+ | Self-report dosage and frequency | Cannabis use was associated with a decline in both systolic and diastolic blood pressure, and heart rate |
| Vallée, 202378 | United Kingdom (Variable) | 46,219 | 40-70 | Lifetime, frequency, current use; stratified into heavy, moderate, low, or never use groups | Current cannabis use was associated with higher arterial stiffness in males, irrespective of use frequency; however, cannabis use did not impact arterial stiffness in females at any use frequency. |
| Vered et al., 202488 | United Kingdom (Variable) | Cross sectional analysis: 19,932; Longitudinal analysis: 1,457 | *Mean* = 68 | Duration of use, group comparisons for current versus former and frequent versus non-frequent use | Cannabis use, particularly longer duration and frequent use, may be related to smaller grey and white matter volumes in older ages, but not related to late-life changes in these measures over time. |
| Watson et al., 202289 | Colorado, U.S. (Locally Legal) | First dataset: 186; Second dataset: 38 | 20-35; 60+ | Group comparisons for regular versus non-use | Stronger connectivity was found between the hippocampus parahippocampal cortex and was also found in targets in the anterior lobes of the cerebellum in older adult cannabis users. Strengthened connectivity between hippocampal and cerebellar structures was also present in 25–35-year-old non-users in comparison to 60–88-year-old non-users. |
| Maynard et al., 202390 | U.S. (Variable) | 1,348 | *Mean* = 67.25 | Group comparisons of current occasional, current frequent, former, and non-use | Greater than weekly cannabis use may lead to attentional and short-term memory deficits, however, sustained abstinence may improve these effects. |
| Rudroff et al., 202291 | Iowa, U.S. (Locally Illegal) | 29 | 50-80 | Group comparison of chronic THC, chronic CBD, and non-use | Chronic use of THC in older adults might negatively influence inhibitory control and alter brain activity. |
| Mueller et al., 202192 | Colorado, U.S. (Locally Legal) | 159 | 21-25; 55-70 | Self-administration of THC dominant, THC+CBD, or CBD dominant flower | Older adults may be less sensitive than younger adults to THC in respect to cognitive effects. |
| Stypulkowski & Thayer, 202293 | Colorado, U.S. (Locally Legal) | 38 | 60-80 | Group comparison on duration of use | Short-term use may not be cognitively harmful for older adults; however, longer-term use may affect cognitive functioning. |
| Mulhauser et al., 202394 | U.S. (Variable) | 26,399 | 60+ | Past-year use (National Survey of Drug Use and Health) | Cannabis use was associated with greater endorsement of subjective memory complaints. |
| Chen et al., 202595 | U.S. (Variable) | 100,685 | 45+ | Past-month use (Behavioral Risk Factor Surveillance System) | Past-month cannabis users reported higher rates of past-year subjective cognitive decline. |
| Chen & Wong, 202496 | U.S. (Variable) | 4,744 | 45+ | Cannabis use reason, frequency, and method (Behavioral Risk Factor Surveillance System) | The reason for cannabis use, but not frequency and method, is associated with subjective cognitive decline. |
| Cury et al., 202597 | Paraíba, Brazil (Variable) | 28 | 60-80 | Administration of daily oral extract, placebo or THC-CBD (0.350 mg/THC and 0.245 mg/CBD) | Low-dose THC-CBD potentially can be an effective and safe therapeutic option for Alzheimer’s-related dementia. |
| Alexandri et al., 202498 | Greece (Variable) | 20 | *Mean* = 72 | 6-month treatment of CBD drops | CBD may be a more effective and safe choice for managing the behavioral and psychological symptoms of dementia than usual interventions. |

aU.S. = United States; bY/N = Yes/No; cOA = older adults; dCBD = cannabidiol; eTHC = delta-9-tetrahydrocannabinol; fCUD = Cannabis Use Disorder; gSUD = Substance Use Disorder; hFMD = flow-mediated dilation; iMI = myocardial infarction
